# Supplementary material for: Therapy of cystitis with nitroxoline—NitroxWin: Prospective, multicenter, non-interventional study and microbiological resistance surveillance
Source: Urologie. 2023 Aug 31;62(11):1186–92. [Article in German] doi: 10.1007/s00120-023-02167-5 (PMC10630225; doi:10.1007/s00120-023-02167-5)
Supplement: Supplementary file 1 [file 120_2023_2167_MOESM1_ESM.pdf]

Suppl. Tabelle 1: Rezidivhäufigkeit bei den 316 eingeschlossenen Patientinnen

| Parameter                                 | Anzahl (%)   |
|-------------------------------------------|--------------|
| Aktuelle HWI mit Rezidiv im letzten Jahr  | 108 (34,2 %) |
| - davon $\geq 3$ Rezidive im letzten Jahr | 41 (13,0 %)  |
| Aktuelle HWI ohne Rezidiv im letzten Jahr | 194 (61,4 %) |
| Keine Angabe                              | 14 (4,4%)    |

Suppl. Tabelle 2: Im Rahmen der NIS verordnete Nitroxolin-Dosierungen bei 296 Patientinnen, bei denen die Dosierung und Therapiedauer registriert wurde.

| Kapseln/Tag | Therapiedauer (Tage) | Anzahl der Patientinnen |
|-------------|----------------------|-------------------------|
| 2           | 5                    | 3                       |
| 2           | 7                    | 4                       |
| 2           | 10                   | 14                      |
| 2           | 25                   | 1                       |
| 3           | 3                    | 1                       |
| 3           | 5                    | 169                     |
| 3           | 6                    | 19                      |
| 3           | 7                    | 70                      |
| 3           | 8                    | 1                       |
| 3           | 10                   | 6                       |
| 3           | 14                   | 1                       |
| 3           | 15                   | 2                       |
| 3           | 20                   | 3                       |
| 4           | 6                    | 2                       |

Suppl. Tabelle 3: Keimzahlen pro ml im Urin der Patientinnen an Tag 1 und am Tag 12-16

| Keimzahlen/ml | Anzahl der Patientinnen |           |
|---------------|-------------------------|-----------|
|               | Tag 1                   | Tag 12-16 |
| 0             | ---                     | 8         |
| 10            | ---                     | 1         |
| 100           | 3                       | 6         |
| 1.000         | ---                     | 2         |
| 10.000        | 13                      | 4         |
| 100.000       | 43                      | 13        |
| 1.000.000     | 59                      | 10        |
| > 1.000.000   | 2                       | ---       |
| Total (n)     | 120                     | 44        |

Suppl. Tabelle 4: Häufigkeit der im Urin nachgewiesenen bakteriellen Erreger bei 38 von 120 Patientinnen mit Urinkultur bei Studienbeginn

| Nachgewiesene Erreger        | Primär | Sekundär |
|------------------------------|--------|----------|
| Escherichia coli             | 27     |          |
| Enterococcus faecalis        | 1      | 4        |
| Klebsiella pneumoniae        | 1      | 2        |
| Proteus mirabilis            | 3      |          |
| Klebsiella oxytoca           | 2      |          |
| Staphylococcus saprophyticus | 1      | 1        |
| Streptococcus agalacticae    | 1      | 1        |
| Morganella morganii          | 1      |          |
| Enterobacter sp.             | 1      |          |
| Candida glabrata             |        | 1        |
| Total (n)                    | 38     | 9        |
